# Supplementary material
Source: MDPI journal article supplement (https://www.mdpi.com/2073-4352/12/12/1727)
Supplement: s1 [file s1]

Supplementary Data

## Effect of Electrolytes on the BiOI/SnO<sub>2</sub> Heterostructure to Achieve Stable Photo-Induced Carrier Generation

I. Neelakanta Reddy, Bhargav Akkinapally, Cheolho Bai \* and Jaesool Shim \*

School of Mechanical Engineering, Yeungnam University, Gyeongsan 38541, Republic of Korea

\* Correspondence: chbai@yu.ac.kr (C.B.); jshim@ynu.ac.kr (J.S.)

**Keywords:** kinetics; heterostructure; electrolyte; spectroscopy analysis; nyquist plot

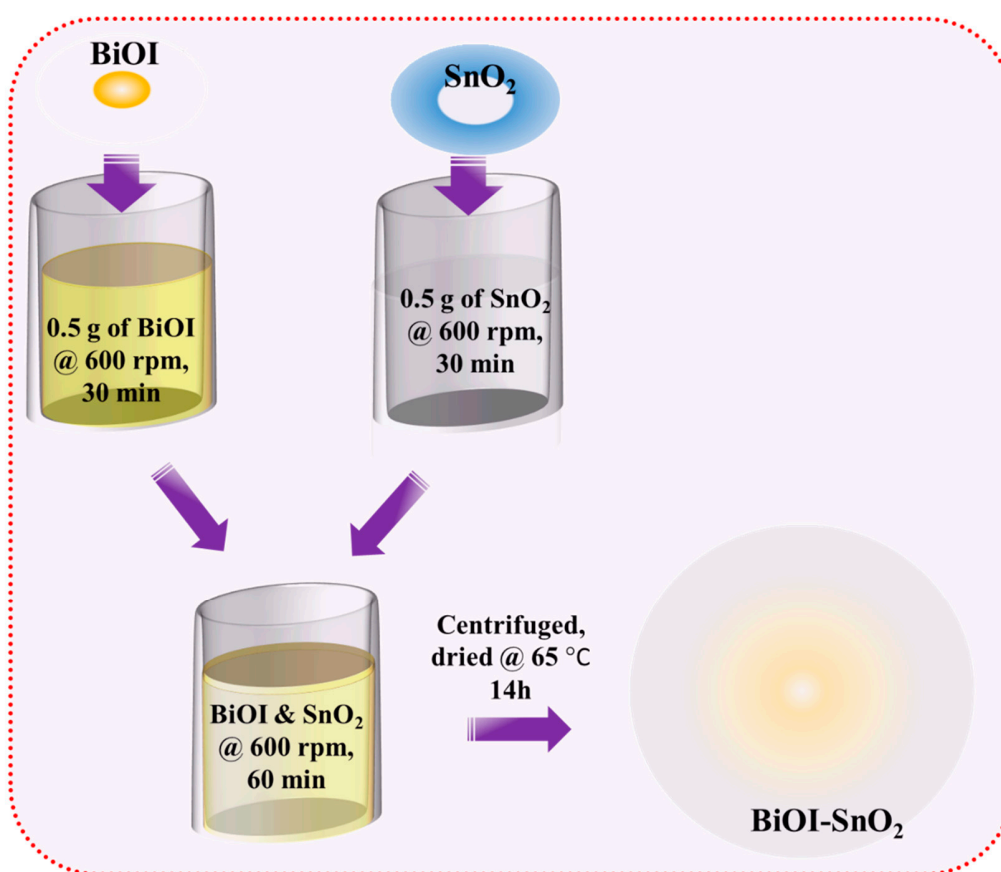

Figure S1. Schematic diagram of composite synthesis.

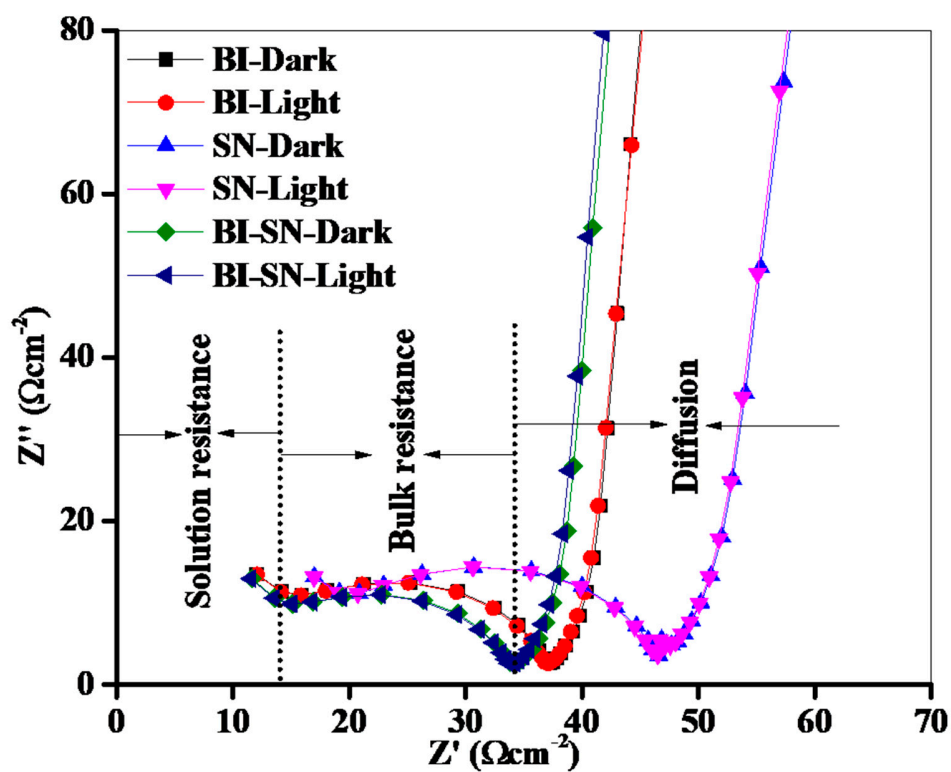

**Figure S2.** Identified regions in EIS spectra of BiOI (BI), SnO<sub>2</sub> (SN), and BiOI-SnO<sub>2</sub> (BI-SN) nanostructures under dark and light state in 0.1 M KOH and 0.1 M Na<sub>2</sub>SO<sub>4</sub> electrolyte.

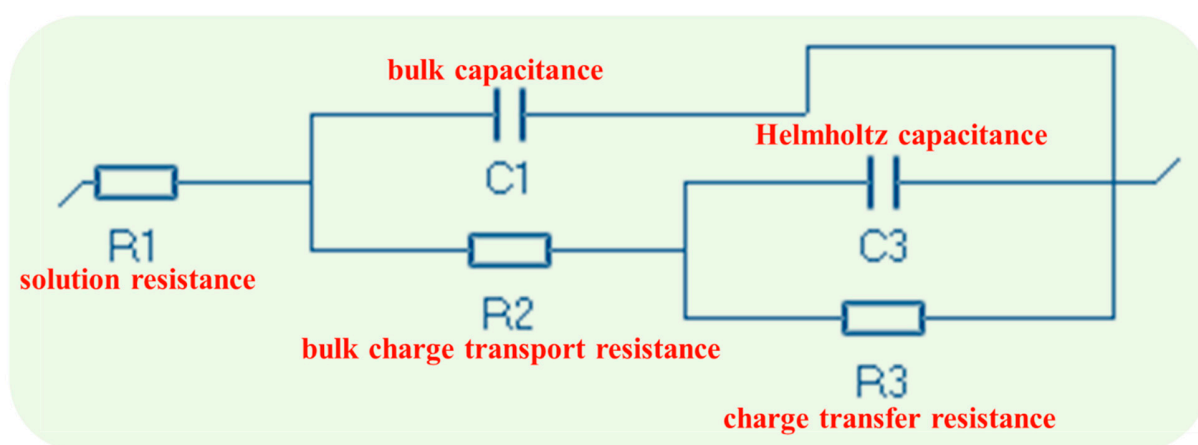

**Figure S3.** Nyquist plots fitted with a physical model for BiOI (BI), SnO<sub>2</sub> (SN) and BiOI-SnO<sub>2</sub> (BI-SN) nanostructures under dark and light state in 0.1 M KOH and 0.1 M Na<sub>2</sub>SO<sub>4</sub> electrolyte.

**Table S1.** Comparison of Tafel analysis with published literatures.

| S.No | Electrolyte                                                     | Photoelectrode                           | Tafel Slope<br>(mV dec <sup>-1</sup> ) | References   |
|------|-----------------------------------------------------------------|------------------------------------------|----------------------------------------|--------------|
| 1    | 1.0 M NaOH                                                      | $\alpha$ -Fe <sub>2</sub> O <sub>3</sub> | 71                                     | [1]          |
| 2    | 3.0 M NaCl                                                      | Graphene/Glassy Carbon                   | 74                                     | [2]          |
| 3    | 0.1 M NaOH                                                      | TiO <sub>2</sub>                         | 270                                    | [3]          |
| 4    | 0.1 M NaOH                                                      | FeNi/TiO <sub>2</sub>                    | 190                                    | [3]          |
| 5    | 0.5 M Bu <sub>4</sub> NBr/0.4 mM trans-Stilbene in acetonitrile | Si Nanowires                             | 240                                    | [4]          |
| 6    | 0.5 M Na <sub>2</sub> SO <sub>4</sub>                           | ZIF-67/TiO <sub>2</sub> nanorods         | 552                                    | [5]          |
|      |                                                                 | BiOI                                     | 63.7                                   |              |
|      | 0.1 M KOH                                                       | SnO <sub>2</sub>                         | 63.4                                   |              |
| 7    |                                                                 | BiOI-SnO <sub>2</sub>                    | 50.6                                   | Present work |
|      | 0.1 M Na <sub>2</sub> SO <sub>4</sub>                           | BiOI                                     | 59.6                                   |              |
|      |                                                                 | SnO <sub>2</sub>                         | 57.3                                   |              |
|      |                                                                 | BiOI-SnO <sub>2</sub>                    | 48.2                                   |              |

## References

1. Jonathon. M.; Navid, S.; Kristine, L.; Paul, B.; Yao, T.; Kenneth, S.B.; Geoffrey, A.O. Activation of Ultrathin Films of Hematite for Photoelectrochemical Water Splitting via H<sub>2</sub> Treatment. *Chem. Sus. Chem.* **2015**, *8*, 1557–1567.
2. Uk, S.; Tae, Y.Y.; Joonhee, M.; Junghyun, A.; Jinyeon, H.; Jung, H.S.; Jouhahn, L.; Kye, Y.K.; Joohee, L.; Seungwu, H.; Byung, H.H.; et al. N-doped monolayer graphene catalyst on silicon photocathode for hydrogen production. *Energy Environ. Sci.* **2013**, *6*, 3658–3664.
3. Hongxia, L.; Hua, Y.; Zhong, L.; Xiaoyang, W.; Xianguo, L.; Sateesh, B.; Xuefeng, Z. Vertically FeNi layered double hydroxide/TiO<sub>2</sub> composite for synergistically enhanced photoelectrochemical water splitting. *Electrochim. Acta* **2021**, *387*, 138533.
4. Bingju, Z.; Da, H.; Ruonan, C.; Tianyue, G.; Yuanxing, W.; Hongyu, C.; Yanhua, Z.; Dunwei, W. Understanding photoelectrochemical kinetics in a model CO<sub>2</sub> fixation reaction. *Phys. Chem. Chem. Phys.* **2019**, *21*, 17517–17520.
5. Waleed, M.A.E.R.; Manuel, A.; Sheng, M.Y.; Pierre, M. Surface sensitization of TiO<sub>2</sub> nanorod mats by electrodeposition of ZIF-67 for water photo-oxidation. *Electrochim. Acta* **2020**, *339*, 135882.
